# Supplementary material
Source: MDPI journal article supplement (https://www.mdpi.com/2071-1050/14/9/5296)
Supplement: s1 [file s1]

**Supplementary Table S1.** Socio-demographic characteristics of the sampled farmers in Fujioka, Japan.

| Variable                                                            | Frequency (n=46) | Percentage (%) |
|---------------------------------------------------------------------|------------------|----------------|
| <b>Age</b>                                                          |                  |                |
| 35-44                                                               | 3                | 6.5            |
| 45-54                                                               | 3                | 6.5            |
| 55-64                                                               | 13               | 28.3           |
| 65-74                                                               | 20               | 43.5           |
| 75 and above                                                        | 7                | 15.2           |
| <b>Sex</b>                                                          |                  |                |
| Male                                                                | 42               | 91.3           |
| Female                                                              | 4                | 8.7            |
| <b>Farming experience</b>                                           |                  |                |
| 9 years and below                                                   | 6                | 13.0           |
| 10-19                                                               | 10               | 21.7           |
| 20-29                                                               | 6                | 13.0           |
| 30-39                                                               | 6                | 13.0           |
| 40 years and above                                                  | 18               | 39.1           |
| <b>Farm type</b>                                                    |                  |                |
| Family farm                                                         | 43               | 93.5           |
| Company farm                                                        | 3                | 6.5            |
| <b>Family farm purpose *</b>                                        |                  |                |
| Self-consumption                                                    | 20               | 43.5           |
| Selling                                                             | 25               | 54.3           |
| <b>Selling place for products*</b>                                  |                  |                |
| Agricultural corporations                                           | 30               | 65.2           |
| Direct to consumers                                                 | 19               | 41.3           |
| Michi-no-eki (roadside farmers' market)                             | 11               | 23.9           |
| Supermarket                                                         | 4                | 8.7            |
| Food processors                                                     | 4                | 8.7            |
| Restaurant                                                          | 3                | 6.5            |
| Central market                                                      | 3                | 6.5            |
| <b>Farming method</b>                                               |                  |                |
| ECA                                                                 | 21               | 45.7           |
| Not ECA                                                             | 25               | 54.3           |
| <b>Number of other family members whose main job is not farming</b> |                  |                |
| 0                                                                   | 23               | 50.0           |
| 1                                                                   | 14               | 30.4           |
| 2                                                                   | 6                | 13.0           |
| 3                                                                   | 1                | 2.2            |
| 4                                                                   | 1                | 2.2            |
| 8                                                                   | 1                | 2.2            |

\* Multiple answer.

**Supplementary Table S2.** ECA-related variables of the sampled farmers in Fujioka, Japan.

| <b>Variable</b>                                                | <b>Frequency (n=46)</b> | <b>Percentage (%)</b> |
|----------------------------------------------------------------|-------------------------|-----------------------|
| <b>ECA interest</b>                                            |                         |                       |
| High                                                           | 17                      | 37.0                  |
| Not high                                                       | 29                      | 63.0                  |
| <b>Interest to discuss or learn about ECA opportunities</b>    |                         |                       |
| Yes                                                            | 12                      | 26.1                  |
| No                                                             | 34                      | 73.9                  |
| <b>ECA continuation</b>                                        |                         |                       |
| Yes                                                            | 11                      | 23.9                  |
| No                                                             | 35                      | 76.1                  |
| <b>Wish for farming *</b>                                      |                         |                       |
| Area no change, same farming method                            | 20                      | 43.5                  |
| Area no change, but towards ECA                                | 7                       | 15.2                  |
| Decrease area, same farming method                             | 6                       | 13.0                  |
| Will expand area using the same farming method                 | 3                       | 6.5                   |
| Will expand current farming towards ECA                        | 1                       | 2.2                   |
| Decrease area, towards ordinary farming                        | 1                       | 2.2                   |
| <b>Reason for ECA continuation *</b>                           |                         |                       |
| To improve local and global environment                        | 14                      | 30.4                  |
| To supply better products                                      | 11                      | 23.9                  |
| Self-health                                                    | 9                       | 19.6                  |
| To build trust with consumers                                  | 7                       | 15.2                  |
| To decrease production cost of fertilizers and pesticides      | 3                       | 6.5                   |
| Demand is high                                                 | 2                       | 4.3                   |
| Good/high price                                                | 1                       | 2.2                   |
| <b>Expectation from ECA *</b>                                  |                         |                       |
| Conservation of biodiversity                                   | 18                      | 39.1                  |
| To add value to quality of products                            | 18                      | 39.1                  |
| Conservation of water quality                                  | 11                      | 23.9                  |
| Promote local industry                                         | 10                      | 21.7                  |
| Increase farm related income                                   | 9                       | 19.6                  |
| Retain residents in rural area                                 | 8                       | 17.4                  |
| Carbon sequestration                                           | 7                       | 15.2                  |
| Retain underground water                                       | 7                       | 15.2                  |
| Decrease effect of weather hazards                             | 4                       | 8.7                   |
| <b>ECA subsidy</b>                                             |                         |                       |
| Never                                                          | 39                      | 84.8                  |
| Have been getting subsidy from before and continues up to date | 6                       | 13.0                  |
| Used to get before but not anymore                             | 1                       | 2.2                   |
| <b>Participation/promotion of exchange programs</b>            |                         |                       |
| No                                                             | 38                      | 82.6                  |
| Yes, with subsidy                                              | 1                       | 2.2                   |

|                                                     |   |      |
|-----------------------------------------------------|---|------|
| Yes, voluntarily                                    | 3 | 6.5  |
| Yes, with pay                                       | 3 | 6.5  |
| Others                                              | 1 | 2.2  |
| <b>Kind of exchange program *</b>                   |   |      |
| Direct sale to consumers and harvesting             | 8 | 17.4 |
| With schoolchildren's extracurricular activities    | 8 | 17.4 |
| Forums with buyers, companies, or restaurant owners | 5 | 10.9 |
| Farming experience for all                          | 5 | 10.9 |
| Local residents (i.e., direct sale mini markets)    | 4 | 8.7  |

\* Multiple answer.

**Supplementary Table S3.** Climate change-related variables of the sampled farmers in Fujioka, Japan.

| Variable                                                                           | Frequency (n=46) | Percentage (%) |
|------------------------------------------------------------------------------------|------------------|----------------|
| <b>Climate change has a very high impact on agriculture</b>                        |                  |                |
| Yes                                                                                | 28               | 60.9           |
| No                                                                                 | 18               | 39.1           |
| <b>Effects of climate change *</b>                                                 |                  |                |
| Increase in temperature and extremely hot days                                     | 35               | 76.1           |
| Heavy torrential rain; flooding                                                    | 28               | 60.9           |
| Change in season duration                                                          | 24               | 52.2           |
| Typhoons, cyclones, or tornadoes                                                   | 21               | 45.7           |
| Damage to farm products                                                            | 14               | 30.4           |
| Change in distribution of plants/crops                                             | 12               | 26.1           |
| Drought                                                                            | 11               | 23.9           |
| Damage to land/farmland                                                            | 10               | 21.7           |
| Melting of glaciers, sea-level rise                                                | 8                | 17.4           |
| Damage to houses/buildings                                                         | 2                | 4.3            |
| <b>Adaptation being undertaken against climate change effects on agriculture *</b> |                  |                |
| Planting high-temperature tolerant varieties                                       | 22               | 47.8           |
| Water management                                                                   | 19               | 41.3           |
| Ameliorate pest/diseases                                                           | 13               | 28.3           |
| Change in planting time/season                                                     | 8                | 17.4           |
| Change land use pattern                                                            | 7                | 15.2           |
| Soil management                                                                    | 5                | 10.9           |
| Choose different crop                                                              | 3                | 6.5            |

\* Multiple answer.
